# Supplementary material for: The incidence and prevalence of IgA nephropathy in Europe
Source: PubMed Central journal article supplement — Nephrol Dial Transplant. 2023 May 8;38(10):2340–9. doi: 10.1093/ndt/gfad082 (PMC10539204; doi:10.1093/ndt/gfad082), 2023-05-08
Supplement: gfad082_supplemental_file.pdf [file gfad082_supplemental_file.pdf]

# Supplementary material

*Supplement to: The incidence and prevalence of IgA nephropathy in Europe.*

## Contents

Supplemental Table S1. Sensitivity analysis: IgAN point prevalence and 2021 expected prevalent cases in European countries, based on national kidney biopsy registry data and regional data (Estimate 1: patients of all ages)

Supplemental Table S2. Sensitivity analysis: Effect of  $\pm 2$  years duration of disease on IgAN point prevalence in European countries (Estimate 1: patients of all ages)

Supplemental Table S3. IgAN annual incidence and 2021 expected incident cases in elderly patients in European countries, based on national kidney biopsy registry data and other nationwide data (and regional data for Germany) (Estimate 3: elderly patients)

References in supplement

**Supplemental Table S1. Sensitivity analysis: IgAN point prevalence and 2021 expected prevalent cases in European countries, based on national kidney biopsy registry data and regional data (Estimate 1: patients of all ages)**

| Country              | Annual IgAN incidence per 100 000 | Median duration of disease (years) | IgAN point prevalence per 10 000 <sup>a</sup> | Population in 2021 <sup>b</sup> | Expected prevalent IgAN cases in 2021 <sup>c</sup> |
|----------------------|-----------------------------------|------------------------------------|-----------------------------------------------|---------------------------------|----------------------------------------------------|
| <i>National data</i> |                                   |                                    |                                               |                                 |                                                    |
| Czech Republic       | 1.16                              | 31                                 | 3.60                                          | 10 494 836                      | 3778                                               |
| Denmark              | 1.08                              | 33.5                               | 3.62                                          | 5 840 045                       | 2114                                               |
| Estonia              | 1.4                               | 31                                 | 4.34                                          | 1 330 068                       | 577                                                |
| Italy                | 0.84                              | 33.5                               | 2.81                                          | 59 236 213                      | 16 645                                             |
| Lithuania            | 1.93                              | 31                                 | 5.98                                          | 2 795 680                       | 1672                                               |
| Norway               | 0.85                              | 40.1                               | 3.41                                          | 5 391 369                       | 1838                                               |
| Poland               | 0.62                              | 31                                 | 1.91                                          | 37 840 001                      | 7227                                               |
| Scotland             | 1.22                              | 33.5                               | 4.07                                          | 5 500 000                       | 2239                                               |
| Spain                | 0.34                              | 33.5                               | 1.14                                          | 47 398 695                      | 5403                                               |
| Sweden               | 1.27                              | 42                                 | 5.33                                          | 10 379 295                      | 5532                                               |
| <i>Regional data</i> |                                   |                                    |                                               |                                 |                                                    |
| Germany [1, 2]       | 1.81 <sup>d</sup>                 | 33.5                               | 6.06                                          | 83 155 031                      | 50 392                                             |
| Northern Ireland [3] | 1.79 <sup>e</sup>                 | 33.5                               | 6.00                                          | 5 006 324                       | 3004                                               |
| Romania [4]          | 1.00 <sup>f</sup>                 | 31                                 | 3.10                                          | 19 201 662                      | 5953                                               |
| Serbia [5, 6]        | 0.51 <sup>g</sup>                 | 31                                 | 1.59                                          | 6 871 547                       | 1093                                               |
| Pooled               | –                                 | –                                  | 3.58 (95% CI: 3.56–3.60) <sup>h</sup>         | 300 440 766                     | 107 468                                            |

CI, confidence interval; IgAN, immunoglobulin A nephropathy.

<sup>a</sup>Calculated as annual IgAN incidence x duration of disease.

<sup>b</sup>See 'Reference populations' section of 'Methods' for sources.

<sup>c</sup>Calculated as point prevalence x population.

<sup>d</sup>Two single-center studies were identified for Germany. Braun et al. [1] reported an annual IgAN incidence of 1.72 (2003–2008). Zink et al. [2] reported an annual IgAN incidence of 1.9 (2006–2013) from a single, internationally recognized teaching hospital. The value presented in the table is the mean of the two estimates.

<sup>e</sup>The Northern Ireland study, while single center, covered all kidney biopsies in the country of Northern Ireland (1996–2005).

<sup>f</sup>Incidence of mesangioproliferative glomerulonephritis (including IgAN) in two regions of Romania (2004). This figure is likely to overestimate IgAN incidence.

<sup>g</sup>Two studies from the same center were identified for Serbia, covering approximately 70% of the country. Naumovic et al. [5] reported an annual IgAN incidence of 0.85 (2000–2006). Brkovic et al. [6] reported an annual IgAN incidence of 0.18, calculated as (number of IgAN cases / study duration) / reference population at the midpoint of the study period (2007–2014). The value presented in the table is the mean of the two estimates.

<sup>h</sup>Calculated as sum of expected prevalent cases / sum of population.

**Supplemental Table S2. Sensitivity analysis: Effect of  $\pm 2$  years duration of disease on IgAN point prevalence in European countries (Estimate 1: patients of all ages)**

| Country                       | Median duration of disease (years) | Median duration $\pm 2$ years | IgAN point prevalence per 10 000 |             |
|-------------------------------|------------------------------------|-------------------------------|----------------------------------|-------------|
|                               |                                    |                               | Lower bound                      | Upper bound |
| Czech Republic                | 31                                 | 29.0–33.0                     | 3.36                             | 3.83        |
| Denmark                       | 33.5                               | 31.5–35.5                     | 3.40                             | 3.83        |
| Estonia                       | 31                                 | 29.0–33.0                     | 4.06                             | 4.62        |
| Italy                         | 33.5                               | 31.5–35.5                     | 2.65                             | 2.98        |
| Lithuania                     | 31                                 | 29.0–33.0                     | 5.60                             | 6.37        |
| Norway                        | 40.1                               | 38.1–42.1                     | 3.24                             | 3.58        |
| Poland                        | 31                                 | 29.0–33.0                     | 1.79                             | 2.04        |
| Scotland                      | 33.5                               | 31.5–35.5                     | 3.83                             | 4.32        |
| Spain                         | 33.5                               | 31.5–35.5                     | 1.07                             | 1.20        |
| Sweden                        | 42                                 | 40.0–44.0                     | 5.08                             | 5.59        |
| Weighted average <sup>a</sup> | –                                  | –                             | 2.48                             | 2.79        |

IgAN, immunoglobulin A nephropathy.

<sup>a</sup>Weighted by population (see 'Reference populations' section of 'Methods' for sources) using the standard formula for weighted arithmetic mean.

**Supplemental Table S3. IgAN annual incidence and 2021 expected incident cases in elderly patients in European countries, based on national kidney biopsy registry data and other nationwide data (and regional data for Germany) (Estimate 3: elderly patients)**

| Country                | Registry                                                        | Time frame | Number of native kidney biopsies in elderly patients | Elderly age group definition | Annual IgAN incidence per 100 000 elderly patients <sup>a</sup> | Elderly population in 2021 <sup>b</sup> | Expected incident IgAN cases in elderly patients in 2021 <sup>c</sup> |
|------------------------|-----------------------------------------------------------------|------------|------------------------------------------------------|------------------------------|-----------------------------------------------------------------|-----------------------------------------|-----------------------------------------------------------------------|
| Czech Republic [7]     | Czech Registry of Renal Biopsies                                | 1994–2011  | 2000                                                 | ≥61 years                    | 0.45                                                            | 2 693 466                               | 12                                                                    |
| Estonia [8]            | Tartu University Hospital                                       | 2001–2010  | 21 <sup>d</sup>                                      | >65 years                    | 0.08                                                            | 260 508                                 | 0                                                                     |
| Germany [2]            | University Hospital Aachen                                      | 1990–2013  | 376                                                  | >60 years                    | 1.09                                                            | 23 226 319                              | 253 <sup>e</sup>                                                      |
| Northern Ireland [3]   | Belfast City Hospital (all kidney biopsies in Northern Ireland) | 1976–2005  | 96 <sup>d</sup>                                      | >65 years                    | 0.37                                                            | 327 297                                 | 1                                                                     |
| Poland [9]             | Polish Registry of Renal Biopsies                               | 2009–2014  | 955                                                  | ≥65 years                    | 0.22                                                            | 7 384 884                               | 16                                                                    |
| Spain [10]             | Spanish Registry of Glomerulonephritis                          | 1994–2019  | 6588                                                 | ≥65 years                    | 0.22                                                            | 9 239 221                               | 20                                                                    |
| Sweden [11]            | Four pathology departments (all kidney biopsies in Sweden)      | 1974–2015  | 490 <sup>f</sup>                                     | ≥60 years                    | 0.68                                                            | 2 690 306                               | 18                                                                    |
| Pooled (incl. Germany) | –                                                               | –          | –                                                    | –                            | 0.70 <sup>g</sup>                                               | 45 822 001                              | 320                                                                   |
| Pooled (excl. Germany) | –                                                               | –          | –                                                    | –                            | 0.30 <sup>g</sup>                                               | 22 595 682                              | 67                                                                    |

IgAN, immunoglobulin A nephropathy.

<sup>a</sup>Calculated as (number of IgAN cases / study duration) / reference population at the midpoint of the study period.

<sup>b</sup>See 'Reference populations' section of 'Methods' for sources.

<sup>c</sup>Calculated as incidence x population.

<sup>d</sup>Number of elderly patients with biopsy-confirmed primary glomerulopathy.

<sup>e</sup>Germany data were from a single, internationally recognized teaching hospital.

<sup>f</sup>Number of elderly patients with biopsy-verified IgAN.

<sup>g</sup>Calculated as sum of expected incident cases / sum of population.

## References in supplement

1. Braun N, Schweisfurth A, Lohöfener C *et al.* Epidemiology of glomerulonephritis in northern Germany. *Int Urol Nephrol* 2011; 43: 1117–1126.
2. Zink CM, Ernst S, Riehl J *et al.* Trends of renal diseases in Germany: review of a regional renal biopsy database from 1990 to 2013. *Clin Kidney J* 2019; 12: 795–800.
3. Hanko JB, Mullan RN, O'Rourke DM, McNamee PT, Maxwell AP, Courtney AE. The changing pattern of adult primary glomerular disease. *Nephrol Dial Transplant* 2009; 24: 3050–3054.
4. Covic A, Schiller A, Volovat C *et al.* Epidemiology of renal disease in Romania: a 10 year review of two regional renal biopsy databases. *Nephrol Dial Transplant* 2006; 21: 419–424.
5. Naumovic R, Pavlovic S, Stojkovic D, Basta-Jovanovic G, Nestic V. Renal biopsy registry from a single centre in Serbia: 20 years of experience. *Nephrol Dial Transplant* 2009; 24: 877–885.
6. Brkovic V, Milinkovic M, Kravljaca M *et al.* Does the pathohistological pattern of renal biopsy change during time? *Pathol Res Pract* 2018; 214: 1632–1637.
7. Maixnerova D, Jancova E, Skibova J *et al.* Nationwide biopsy survey of renal diseases in the Czech Republic during the years 1994–2011. *J Nephrol* 2015; 28: 39–49.
8. Riispere Ž, Ots-Rosenberg M. Occurrence of kidney diseases and patterns of glomerular disease based on a 10-year kidney biopsy material: a retrospective single-centre analysis in Estonia. *Scand J Urol Nephrol* 2012; 46: 389–394.
9. Perkowska-Ptasinska A, Bartczak A, Wagrowska-Danilewicz M *et al.*; Polish Society of Nephrology. Clinicopathologic correlations of renal pathology in the adult population of Poland. *Nephrol Dial Transplant* 2017; 32 (Suppl 2): ii209–ii218.
10. López-Gómez JM, Rivera F. Spanish registry of glomerulonephritis 2020 revisited: past, current data and new challenges. *Nefrologia (Engl Ed)* 2020; 40: 371–383.
11. Jarrick S, Lundberg S, Welander A *et al.* Mortality in IgA nephropathy: a nationwide population-based cohort study. *J Am Soc Nephrol* 2019; 30: 866–876.
